# Supplementary material for: Physiological and transcriptome response to cadmium in cosmos (Cosmos bipinnatus Cav.) seedlings
Source: PubMed Central journal article supplement (PMC5665871; doi:10.1038/s41598-017-14407-8), 2017-10-31
Supplement: 41598_2017_14407_MOESM1_ESM.pdf [file 41598_2017_14407_MOESM1_ESM.pdf]

# Physiological and transcriptome response to cadmium in cosmos (*Cosmos bipinnatus* Cav.) seedlings

Yujing Liu <sup>1, a</sup>, Xiaofang Yu <sup>1, a\*</sup>, Yimei Feng <sup>1</sup>, Chao Zhang <sup>2</sup>, Chao Wang <sup>3</sup>, Jian Zeng <sup>4</sup>, Zhuo Huang <sup>1</sup>, Houyang Kang <sup>3</sup>, Xing Fan <sup>3</sup>, Lina Sha <sup>3</sup>, Haiqin Zhang <sup>3</sup>, Yonghong Zhou<sup>3</sup>, Suping Gao <sup>1</sup> and Qibing Chen <sup>1</sup>

<sup>1</sup> Landscape Architecture, Sichuan Agricultural University, Wenjiang 611130, Sichuan, China

<sup>2</sup> Industrial Crop Research Institute of Sichuan Academy of Agricultural Sciences, Qingbaijiang 610300, Sichuan, China

<sup>3</sup> Triticeae Research Institute, Sichuan Agricultural University, Wenjiang 611130, Sichuan, China

<sup>4</sup> College of Resources, Sichuan Agricultural University, Wenjiang 611130, Sichuan, China

<sup>a</sup> These authors contributed equally to this work

\* **Correspondence:**

Corresponding Author:

[xiaofangyu@sicau.edu.cn](mailto:xiaofangyu@sicau.edu.cn)

STable 1 The qRT-PCR primers of 14 DEGs

| Unigenes ID | Description                                  | sense primer            | anti-sense primer        |
|-------------|----------------------------------------------|-------------------------|--------------------------|
| c68186_c1   | Ribulose biphosphate carboxylase large chain | CCGTGAACAGCCAACCAT      | ACAGAGAGCCGACAAGGAA      |
| c66489_c0   | UDP-glycosyltransferase 74B1                 | CCGAGTTTGAAGGCTTGGTTT   | AGGTGGTGAATGGCATAAGGA    |
| c81790_c0   | Photosystem II CP47 reaction center protein  | ACAGTTCAAGTGGCAGTTAGTG  | CTCAGGTTTCATCGTCATCATCAT |
| c68390_c0   | Cadmium/zinc-transporting ATPase HMA3        | TAGTGGATGATGAGGTGTTGGTA | TGGTGCTGTTGCCTTGAC       |
| c72996_c0   | L-ascorbate oxidase homolog                  | GTAGCGTTGAGCATCGTTGA    | TTGGTTGAGGTTGAAGGAACTC   |
| c80637_c0   | Galactinol--sucrose galactosyltransferase    | TGGTTGAGCATACGAATCTTGT  | CCGCATCTTGAGCCACTT       |
| c82493_c0   | ABC transporter G family member 16           | ACGCTGCTAAGACTGTCATTG   | ACGATGCTACCGCTCTGT       |
| c56776_c0   | Cadmium/zinc-transporting ATPase HMA2        | CCTGGCTGAATGGCTTGAA     | TTGGTTGAGTTGGTGTCTTGTT   |
| c73636_c0   | Zinc transporter 4                           | CCGTGTGAGTGTGAATGTGAAT  | GGCTGTGAAGGACAAGTGAG     |
| c81263_c0   | ABC transporter G family member 22           | TCTGTCTCGGCTATGTCTTGT   | AATCCCTCCCTCTTGTTTCCTT   |
| c80747_c0   | Cellulose synthase-like protein G3           | GGACCGAACACCGTATATTAAGG | CATTGCGAAGGCTGGAAGT      |
| c69105_c0   | ABC transporter A family member 7            | CGCATCCACATATCAAGCACAA  | CAGCAGTAGCAGGTCCAGTA     |
| c52639_c0   | Glutathione S-transferase F13                | ATGCCTGCTTGGACAACCTG    | TGGTGGACAACCTGGATGGA     |
| c84507_c0   | Zinc transporter 5                           | CTGCTTGGAATGGAACCTGCTAT | GATGAGAATGGACCTGCCTTG    |
| c68921_c0   | Actin (reference gene)                       | AGTTCCTCTTAAATCGGTCCTT  | CTGCTGAATGTCGTTATGCTGTA  |

STable 2 KEGG pathway of all the unigenes

| The first level classification       | The second level classification  | Pathway definition                          | pathway ID | Number of genes |
|--------------------------------------|----------------------------------|---------------------------------------------|------------|-----------------|
| Genetic information processing       | Translation                      | Ribosome                                    | ko03010    | 1321            |
| Metabolism                           | Global and overview maps         | Carbon metabolism                           | ko01200    | 857             |
| Metabolism                           | Global and overview maps         | Biosynthesis of amino acids                 | ko01230    | 811             |
| Genetic information processing       | Folding, Sorting and degradation | Protein processing in endoplasmic reticulum | ko04141    | 600             |
| Genetic information processing       | Transcription                    | Spliceosome                                 | ko03040    | 498             |
| Metabolism                           | Energy metabolism                | Oxidative phosphorylation                   | ko00190    | 475             |
| Genetic information processing       | Translation                      | RNA transport                               | ko03013    | 474             |
| Environmental information processing | Signal transduction              | Plant hormone signal transduction           | ko04075    | 416             |
| Metabolism                           | Nucleotide metabolism            | Purine metabolism                           | ko00230    | 392             |
| Metabolism                           | Carbohydrate metabolism          | Starch and sucrose metabolism               | ko00500    | 391             |
| Metabolism                           | Carbohydrate metabolism          | Glycolysis / Gluconeogenesis                | ko00010    | 361             |
| Cellular processes                   | Transport and catabolism         | Endocytosis                                 | ko04144    | 357             |
| Genetic information processing       | Translation                      | mRNA surveillance pathway                   | ko03015    | 302             |
| Metabolism                           | Carbohydrate metabolism          | Pyruvate metabolism                         | ko00620    | 301             |
| Cellular processes                   | Transport and catabolism         | Phagosome                                   | ko04145    | 296             |
| Genetic information processing       | Folding, Sorting and degradation | Ubiquitin mediated proteolysis              | ko04120    | 292             |
| Metabolism                           | Energy metabolism                | Carbon fixation in photosynthetic organisms | ko00710    | 291             |
| Metabolism                           | Nucleotide metabolism            | Pyrimidine metabolism                       | ko00240    | 287             |
| Genetic information processing       | Folding, Sorting and degradation | RNA degradation                             | ko03018    | 284             |

|                                |                                             |                                             |         |     |
|--------------------------------|---------------------------------------------|---------------------------------------------|---------|-----|
| Metabolism                     | Global and overview maps                    | Fatty acid metabolism                       | ko01212 | 281 |
| Metabolism                     | Amino acid metabolism                       | Cysteine and methionine metabolism          | ko00270 | 270 |
|                                |                                             | Amino sugar and nucleotide sugar metabolism |         |     |
| Metabolism                     | Carbohydrate metabolism                     |                                             | ko00520 | 252 |
|                                | Biosynthesis of other secondary metabolites | Phenylpropanoid biosynthesis                | ko00940 | 251 |
| Metabolism                     | Energy metabolism                           | Photosynthesis                              | ko00195 | 248 |
| Metabolism                     | Amino acid metabolism                       | Glycine, serine and threonine metabolism    | ko00260 | 246 |
| Metabolism                     | Metabolism of other amino acids             | Glutathione metabolism                      | ko00480 | 241 |
| Metabolism                     | Amino acid metabolism                       | Arginine and proline metabolism             | ko00330 | 236 |
| Organismal systems             | Environmental adaptation                    | Plant-pathogen interaction                  | ko04626 | 235 |
| Genetic information processing | Translation                                 | Ribosome biogenesis in eukaryotes           | ko03008 | 234 |
| Metabolism                     | Carbohydrate metabolism                     | Glyoxylate and dicarboxylate metabolism     | ko00630 | 232 |
| Genetic information processing | Folding, Sorting and degradation            | Proteasome                                  | ko03050 | 221 |
| Cellular processes             | Transport and catabolism                    | Peroxisome                                  | ko04146 | 216 |
| Metabolism                     | Carbohydrate metabolism                     | Citrate cycle (TCA cycle)                   | ko00020 | 211 |
|                                |                                             | Alanine, aspartate and glutamate metabolism |         |     |
| Metabolism                     | Amino acid metabolism                       |                                             | ko00250 | 204 |
| Metabolism                     | Global and overview maps                    | 2-Oxocarboxylic acid metabolism             | ko01210 | 199 |
| Metabolism                     | Amino acid metabolism                       | Phenylalanine metabolism                    | ko00360 | 195 |
| Genetic information processing | Translation                                 | Aminoacyl-tRNA biosynthesis                 | ko00970 | 183 |
| Metabolism                     | Carbohydrate metabolism                     | Pentose phosphate pathway                   | ko00030 | 173 |
| Metabolism                     | Lipid metabolism                            | Glycerophospholipid metabolism              | ko00564 | 159 |
| Metabolism                     | Lipid metabolism                            | Fatty acid degradation                      | ko00071 | 146 |

---

|                                      |                                          |                                                     |         |     |
|--------------------------------------|------------------------------------------|-----------------------------------------------------|---------|-----|
| Environmental information processing | Signal transduction                      | Phosphatidylinositol signaling system               | ko04070 | 138 |
| Metabolism                           | Lipid metabolism                         | Fatty acid biosynthesis                             | ko00061 | 137 |
| Metabolism                           | Lipid metabolism                         | Biosynthesis of unsaturated fatty acids             | ko01040 | 132 |
| Metabolism                           | Amino acid metabolism                    | Phenylalanine, tyrosine and tryptophan biosynthesis | ko00400 | 132 |
| Metabolism                           | Carbohydrate metabolism                  | Inositol phosphate metabolism                       | ko00562 | 130 |
| Metabolism                           | Lipid metabolism                         | Glycerolipid metabolism                             | ko00561 | 129 |
| Metabolism                           | Carbohydrate metabolism                  | Pentose and glucuronate interconversions            | ko00040 | 129 |
| Genetic information processing       | Replication and repair                   | Nucleotide excision repair                          | ko03420 | 128 |
| Genetic information processing       | Folding, Sorting and degradation         | Protein export                                      | ko03060 | 128 |
| Metabolism                           | Lipid metabolism                         | alpha-Linolenic acid metabolism                     | ko00592 | 127 |
| Metabolism                           | Replication and repair                   | DNA replication                                     | ko03030 | 125 |
| Metabolism                           | Energy metabolism                        | Nitrogen metabolism                                 | ko00910 | 125 |
| Metabolism                           | Carbohydrate metabolism                  | Fructose and mannose metabolism                     | ko00051 | 123 |
| Metabolism                           | Amino acid metabolism                    | Valine, leucine and isoleucine degradation          | ko00280 | 120 |
| Metabolism                           | Energy metabolism                        | Photosynthesis - antenna proteins                   | ko00196 | 119 |
| Metabolism                           | Energy metabolism                        | Sulfur metabolism                                   | ko00920 | 117 |
| Metabolism                           | Metabolism of terpenoids and polyketides | Terpenoid backbone biosynthesis                     | ko00900 | 117 |
| Metabolism                           | Carbohydrate metabolism                  | Galactose metabolism                                | ko00052 | 114 |
| Metabolism                           | Metabolism of cofactors and vitamins     | Porphyrin and chlorophyll metabolism                | ko00860 | 112 |
| Metabolism                           | Glycan biosynthesis and metabolism       | N-Glycan biosynthesis                               | ko00510 | 93  |

---

|                                      |                                  |                                           |         |    |
|--------------------------------------|----------------------------------|-------------------------------------------|---------|----|
| Metabolism                           | Carbohydrate metabolism          | Propanoate metabolism                     | ko00640 | 92 |
| Metabolism                           | Carbohydrate metabolism          | Ascorbate and aldarate metabolism         | ko00053 | 89 |
| Metabolism                           | Lipid metabolism                 | Steroid biosynthesis                      | ko00100 | 88 |
| Metabolism                           | Metabolism of other amino acids  | beta-Alanine metabolism                   | ko00410 | 87 |
| Metabolism                           | Amino acid metabolism            | Tyrosine metabolism                       | ko00350 | 87 |
| Metabolism                           | Replication and repair           | Mismatch repair                           | ko03430 | 86 |
| Metabolism                           | Replication and repair           | Homologous recombination                  | ko03440 | 85 |
| Organismal systems                   | Environmental adaptation         | Circadian rhythm - plant                  | ko04712 | 83 |
| Genetic information processing       | Transcription                    | RNA polymerase                            | ko03020 | 82 |
| Metabolism                           | Metabolism of other amino acids  | Cyanoamino acid metabolism                | ko00460 | 81 |
|                                      |                                  | Valine, leucine and isoleucine            |         |    |
| Metabolism                           | Amino acid metabolism            | biosynthesis                              | ko00290 | 81 |
|                                      | Metabolism of cofactors and      |                                           |         |    |
| Metabolism                           | vitamins                         | Pantothenate and CoA biosynthesis         | ko00770 | 80 |
| Genetic information processing       | Transcription                    | Basal transcription factors               | ko03022 | 79 |
| Genetic information processing       | Folding, Sorting and degradation | SNARE interactions in vesicular transport | ko04130 | 77 |
| Metabolism                           | Amino acid metabolism            | Lysine degradation                        | ko00310 | 71 |
|                                      | Metabolism of cofactors and      |                                           |         |    |
| Metabolism                           | vitamins                         | One carbon pool by folate                 | ko00670 | 71 |
| Metabolism                           | Lipid metabolism                 | Sphingolipid metabolism                   | ko00600 | 71 |
| Cellular processes                   | Transport and catabolism         | Regulation of autophagy                   | ko04140 | 69 |
| Genetic information processing       | Replication and repair           | Base excision repair                      | ko03410 | 67 |
| Environmental information processing | Membrane transport               | ABC transporters                          | ko02010 | 66 |

---

|            |                                             |                                                        |         |    |
|------------|---------------------------------------------|--------------------------------------------------------|---------|----|
| Metabolism | Biosynthesis of other secondary metabolites | Flavonoid biosynthesis                                 | ko00941 | 66 |
| Metabolism | Metabolism of other amino acids             | Selenocompound metabolism                              | ko00450 | 66 |
| Metabolism | Amino acid metabolism                       | Tryptophan metabolism                                  | ko00380 | 65 |
| Metabolism | Amino acid metabolism                       | Histidine metabolism                                   | ko00340 | 62 |
| Metabolism | Metabolism of terpenoids and polyketides    | Carotenoid biosynthesis                                | ko00906 | 58 |
| Metabolism | Metabolism of cofactors and vitamins        | Nicotinate and nicotinamide metabolism                 | ko00760 | 56 |
| Metabolism | Metabolism of cofactors and vitamins        | Ubiquinone and other terpenoid-quinone biosynthesis    | ko00130 | 55 |
| Metabolism | Lipid metabolism                            | Fatty acid elongation                                  | ko00062 | 54 |
| Metabolism | Amino acid metabolism                       | Lysine biosynthesis                                    | ko00300 | 53 |
| Metabolism | Biosynthesis of other secondary metabolites | Tropane, piperidine and pyridine alkaloid biosynthesis | ko00960 | 52 |
| Metabolism | Carbohydrate metabolism                     | Butanoate metabolism                                   | ko00650 | 50 |
| Metabolism | Lipid metabolism                            | Arachidonic acid metabolism                            | ko00590 | 46 |
| Metabolism | Lipid metabolism                            | Ether lipid metabolism                                 | ko00565 | 44 |
| Metabolism | Lipid metabolism                            | Linoleic acid metabolism                               | ko00591 | 43 |
| Metabolism | Biosynthesis of other secondary metabolites | Isoquinoline alkaloid biosynthesis                     | ko00950 | 41 |
| Metabolism | Biosynthesis of other secondary metabolites | Stilbenoid, diarylheptanoid and gingerol biosynthesis  | ko00945 | 41 |
| Metabolism | Metabolism of cofactors and vitamins        | Biotin metabolism                                      | ko00780 | 40 |

---

---

|                                |                                          |                                                       |         |    |
|--------------------------------|------------------------------------------|-------------------------------------------------------|---------|----|
| Metabolism                     | Metabolism of cofactors and vitamins     | Folate biosynthesis                                   | ko00790 | 36 |
| Metabolism                     | Metabolism of cofactors and vitamins     | Thiamine metabolism                                   | ko00730 | 35 |
| Metabolism                     | Carbohydrate metabolism                  | C5-Branched dibasic acid metabolism                   | ko00660 | 33 |
| Metabolism                     | Metabolism of cofactors and vitamins     | Vitamin B6 metabolism                                 | ko00750 | 33 |
| Metabolism                     | Glycan biosynthesis and metabolism       | Glycosylphosphatidylinositol(GPI)-anchor biosynthesis | ko00563 | 26 |
| Metabolism                     | Glycan biosynthesis and metabolism       | Other glycan degradation                              | ko00511 | 26 |
| Metabolism                     | Metabolism of terpenoids and polyketides | Zeatin biosynthesis                                   | ko00908 | 25 |
| Metabolism                     | Lipid metabolism                         | Cutin, suberine and wax biosynthesis                  | ko00073 | 23 |
| Genetic information processing | Folding, Sorting and degradation         | Sulfur relay system                                   | ko04122 | 22 |
| Metabolism                     | Metabolism of cofactors and vitamins     | Riboflavin metabolism                                 | ko00740 | 21 |
| Metabolism                     | Global and overview maps                 | Degradation of aromatic compounds                     | ko01220 | 20 |
| Metabolism                     | Metabolism of terpenoids and polyketides | Diterpenoid biosynthesis                              | ko00904 | 20 |
| Metabolism                     | Glycan biosynthesis and metabolism       | Glycosaminoglycan degradation                         | ko00531 | 19 |
| Metabolism                     | Metabolism of other amino acids          | Taurine and hypotaurine metabolism                    | ko00430 | 17 |
| Genetic information processing | Replication and repair                   | Non-homologous end-joining                            | ko03450 | 16 |
| Metabolism                     | Metabolism of terpenoids and polyketides | Sesquiterpenoid and triterpenoid biosynthesis         | ko00909 | 16 |

---



---

|            |                                             |                                                |         |    |
|------------|---------------------------------------------|------------------------------------------------|---------|----|
| Metabolism | Metabolism of terpenoids and polyketides    | Brassinosteroid biosynthesis                   | ko00905 | 15 |
| Metabolism | Metabolism of terpenoids and polyketides    | Monoterpenoid biosynthesis                     | ko00902 | 15 |
| Metabolism | Glycan biosynthesis and metabolism          | Other types of O-glycan biosynthesis           | ko00514 | 14 |
| Metabolism | Lipid metabolism                            | Synthesis and degradation of ketone bodies     | ko00072 | 13 |
| Metabolism | Glycan biosynthesis and metabolism          | Glycosphingolipid biosynthesis - globoseries   | ko00603 | 12 |
| Metabolism | Metabolism of terpenoids and polyketides    | Limonene and pinene degradation                | ko00903 | 10 |
| Metabolism | Biosynthesis of other secondary metabolites | Caffeine metabolism                            | ko00232 | 9  |
| Metabolism | Metabolism of cofactors and vitamins        | Lipoic acid metabolism                         | ko00785 | 8  |
| Metabolism | Biosynthesis of other secondary metabolites | Anthocyanin biosynthesis                       | ko00942 | 7  |
| Metabolism | Biosynthesis of other secondary metabolites | Flavone and flavonol biosynthesis              | ko00944 | 7  |
| Metabolism | Glycan biosynthesis and metabolism          | Glycosphingolipid biosynthesis - ganglioseries | ko00604 | 5  |
| Metabolism | Biosynthesis of other secondary metabolites | Glucosinolate biosynthesis                     | ko00966 | 2  |

---

---

|            |                                             |                            |         |   |
|------------|---------------------------------------------|----------------------------|---------|---|
| Metabolism | Biosynthesis of other secondary metabolites | Benzoxazinoid biosynthesis | ko00402 | 1 |
| Metabolism | Biosynthesis of other secondary metabolites | Betalain biosynthesis      | ko00965 | 1 |
| Metabolism | Biosynthesis of other secondary metabolites | Carbapenem biosynthesis    | ko00332 | 1 |

---

STable 3 KEGG pathway of the differential expression genes

| KEGG Pathway description                    | pathway ID | Unigene number |
|---------------------------------------------|------------|----------------|
| Ribosome                                    | ko03010    | 155            |
| Carbon metabolism                           | ko01200    | 98             |
| Protein processing in endoplasmic reticulum | ko04141    | 88             |
| Biosynthesis of amino acids                 | ko01230    | 85             |
| Oxidative phosphorylation                   | ko00190    | 84             |
| Photosynthesis                              | ko00195    | 61             |
| Spliceosome                                 | ko03040    | 45             |
| Phagosome                                   | ko04145    | 43             |
| RNA transport                               | ko03013    | 43             |
| Starch and sucrose metabolism               | ko00500    | 42             |
| Glutathione metabolism                      | ko00480    | 42             |
| Cysteine and methionine metabolism          | ko00270    | 41             |
| Endocytosis                                 | ko04144    | 41             |
| Glyoxylate and dicarboxylate metabolism     | ko00630    | 40             |
| Fatty acid metabolism                       | ko01212    | 40             |
| Fatty acid metabolism                       | ko00330    | 38             |
| Carbon fixation in photosynthetic organisms | ko00710    | 37             |
| Glycolysis / Gluconeogenesis                | ko00010    | 37             |
| Purine metabolism                           | ko00230    | 35             |

---

|                                             |         |    |
|---------------------------------------------|---------|----|
| Proteasome                                  | ko03050 | 35 |
| Pyrimidine metabolism                       | ko00240 | 35 |
| Plant hormone signal transduction           | ko04075 | 33 |
| Glycine, serine and threonine metabolism    | ko00260 | 32 |
| Peroxisome                                  | ko04146 | 31 |
| Pyruvate metabolism                         | ko00620 | 30 |
| Ubiquitin mediated proteolysis              | ko04120 | 30 |
| Photosynthesis - antenna proteins           | ko00196 | 30 |
| Amino sugar and nucleotide sugar metabolism | ko00520 | 27 |
| Biosynthesis of unsaturated fatty acids     | ko01040 | 27 |
| 2-Oxocarboxylic acid metabolism             | ko01210 | 24 |
| Alanine, aspartate and glutamate metabolism | ko00250 | 24 |
| Citrate cycle (TCA cycle)                   | ko00020 | 24 |
| Fatty acid degradation                      | ko00071 | 23 |
| Phenylpropanoid biosynthesis                | ko00940 | 22 |
| Ascorbate and aldarate metabolism           | ko00053 | 21 |
| Phenylalanine metabolism                    | ko00360 | 21 |
| alpha-Linolenic acid metabolism             | ko00592 | 20 |
| Ribosome biogenesis in eukaryotes           | ko03008 | 17 |
| Plant-pathogen interaction                  | ko04626 | 17 |
| Protein export                              | ko03060 | 17 |
| mRNA surveillance pathway                   | ko03015 | 17 |
| Pentose and glucuronate interconversions    | ko00040 | 16 |
| Valine, leucine and isoleucine degradation  | ko00280 | 15 |
| Nitrogen metabolism                         | ko00910 | 15 |

---

---

|                                                     |         |    |
|-----------------------------------------------------|---------|----|
| Sulfur metabolism                                   | ko00920 | 15 |
| Pentose phosphate pathway                           | ko00030 | 15 |
| Inositol phosphate metabolism                       | ko00562 | 14 |
| Fatty acid biosynthesis                             | ko00061 | 14 |
| Aminoacyl-tRNA biosynthesis                         | ko00970 | 14 |
| Glycerophospholipid metabolism                      | ko00564 | 13 |
| Tryptophan metabolism                               | ko00380 | 13 |
| Phosphatidylinositol signaling system               | ko04070 | 13 |
| Fructose and mannose metabolism                     | ko00051 | 12 |
| RNA polymerase                                      | ko03020 | 12 |
| Terpenoid backbone biosynthesis                     | ko00900 | 12 |
| RNA degradation                                     | ko03018 | 12 |
| DNA replication                                     | ko03030 | 12 |
| beta-Alanine metabolism                             | ko00410 | 11 |
| Flavonoid biosynthesis                              | ko00941 | 11 |
| Phenylalanine, tyrosine and tryptophan biosynthesis | ko00400 | 11 |
| Tyrosine metabolism                                 | ko00350 | 11 |
| Steroid biosynthesis                                | ko00100 | 10 |
| Valine, leucine and isoleucine biosynthesis         | ko00290 | 10 |
| One carbon pool by folate                           | ko00670 | 10 |
| Cyanoamino acid metabolism                          | ko00460 | 10 |
| Nucleotide excision repair                          | ko03420 | 9  |
| Histidine metabolism                                | ko00340 | 9  |
| SNARE interactions in vesicular transport           | ko04130 | 9  |
| Galactose metabolism                                | ko00052 | 8  |

---

---

|                                                        |         |   |
|--------------------------------------------------------|---------|---|
| Lysine degradation                                     | ko00310 | 8 |
| Nicotinate and nicotinamide metabolism                 | ko00760 | 8 |
| Glycerolipid metabolism                                | ko00561 | 8 |
| Thiamine metabolism                                    | ko00730 | 8 |
| Selenocompound metabolism                              | ko00450 | 7 |
| Pantothenate and CoA biosynthesis                      | ko00770 | 7 |
| ABC transporters                                       | ko02010 | 7 |
| Circadian rhythm - plant                               | ko04712 | 7 |
| Mismatch repair                                        | ko03430 | 7 |
| Arachidonic acid metabolism                            | ko00590 | 7 |
| N-Glycan biosynthesis                                  | ko00510 | 7 |
| Propanoate metabolism                                  | ko00640 | 6 |
| Carotenoid biosynthesis                                | ko00906 | 6 |
| Vitamin B6 metabolism                                  | ko00750 | 6 |
| Homologous recombination                               | ko03440 | 6 |
| Porphyrin and chlorophyll metabolism                   | ko00860 | 6 |
| Isoquinoline alkaloid biosynthesis                     | ko00950 | 5 |
| Sphingolipid metabolism                                | ko00600 | 5 |
| Ubiquinone and other terpenoid-quinone biosynthesis    | ko00130 | 5 |
| Regulation of autophagy                                | ko04140 | 5 |
| C5-Branched dibasic acid metabolism                    | ko00660 | 5 |
| Tropane, piperidine and pyridine alkaloid biosynthesis | ko00960 | 5 |
| Linoleic acid metabolism                               | ko00591 | 5 |
| Butanoate metabolism                                   | ko00650 | 4 |

---

---

|                                                       |         |   |
|-------------------------------------------------------|---------|---|
| Diterpenoid biosynthesis                              | ko00904 | 4 |
| Folate biosynthesis                                   | ko00790 | 4 |
| Fatty acid elongation                                 | ko00062 | 4 |
| Degradation of aromatic compounds                     | ko01220 | 4 |
| Other types of O-glycan biosynthesis                  | ko00514 | 3 |
| Ether lipid metabolism                                | ko00565 | 3 |
| Zeatin biosynthesis                                   | ko00908 | 3 |
| Brassinosteroid biosynthesis                          | ko00905 | 3 |
| Lysine biosynthesis                                   | ko00300 | 3 |
| Basal transcription factors                           | ko03022 | 3 |
| Riboflavin metabolism                                 | ko00740 | 2 |
| Glucosinolate biosynthesis                            | ko00966 | 2 |
| Limonene and pinene degradation                       | ko00903 | 2 |
| Cutin, suberine and wax biosynthesis                  | ko00073 | 2 |
| Taurine and hypotaurine metabolism                    | ko00430 | 2 |
| Sesquiterpenoid and triterpenoid biosynthesis         | ko00909 | 2 |
| Stilbenoid, diarylheptanoid and gingerol biosynthesis | ko00945 | 2 |
| Biotin metabolism                                     | ko00780 | 2 |
| Monoterpenoid biosynthesis                            | ko00902 | 1 |
| Caffeine metabolism                                   | ko00232 | 1 |
| Lipoic acid metabolism                                | ko00785 | 1 |
| Base excision repair                                  | ko03410 | 1 |
| Flavone and flavonol biosynthesis                     | ko00944 | 1 |

---

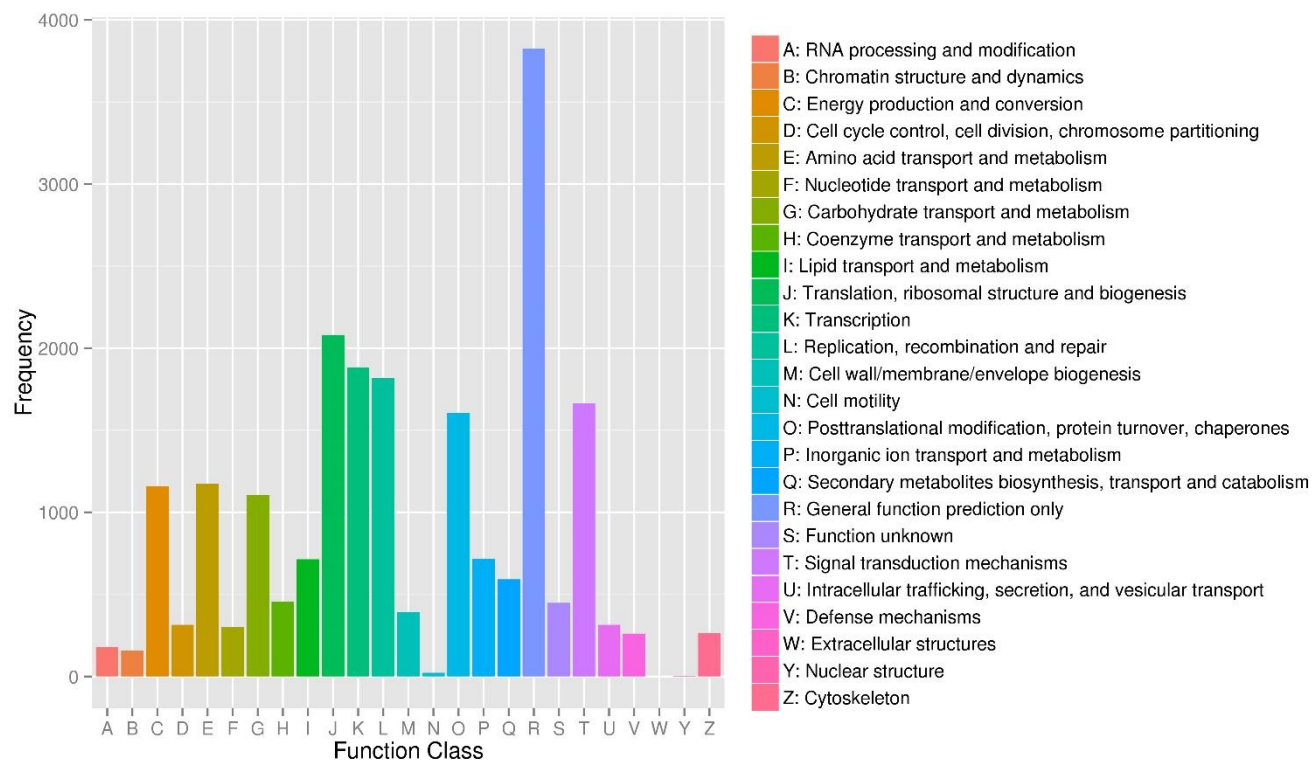

SFigure 1 COG function classification of consensus sequence



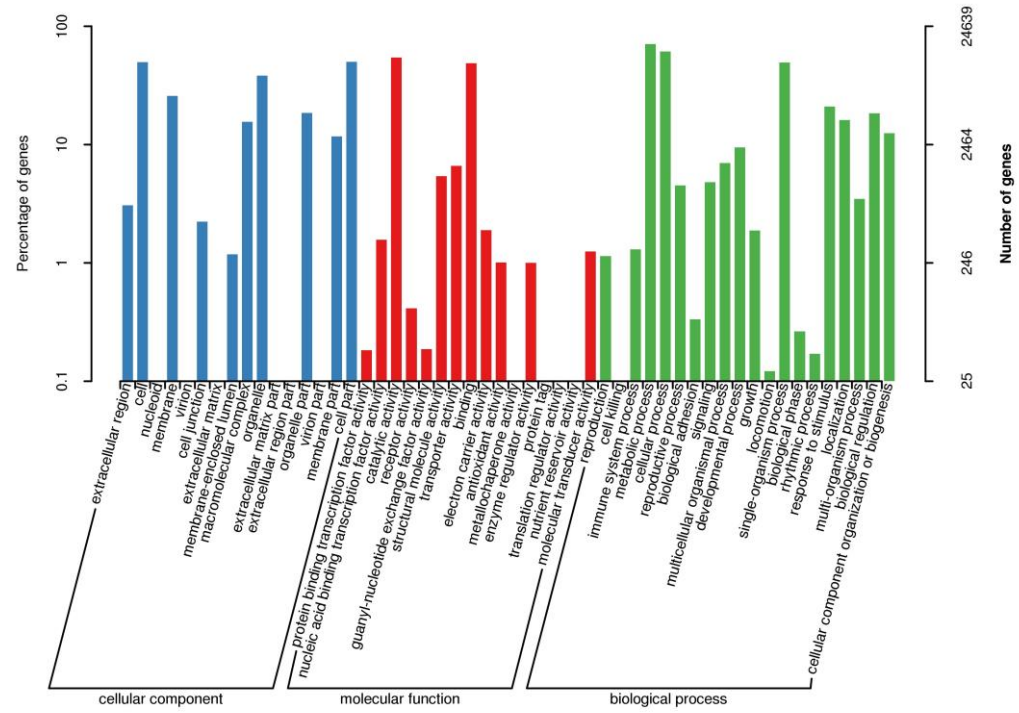

SFigure 2 Gene ontology (GO) classification of assembled transcripts

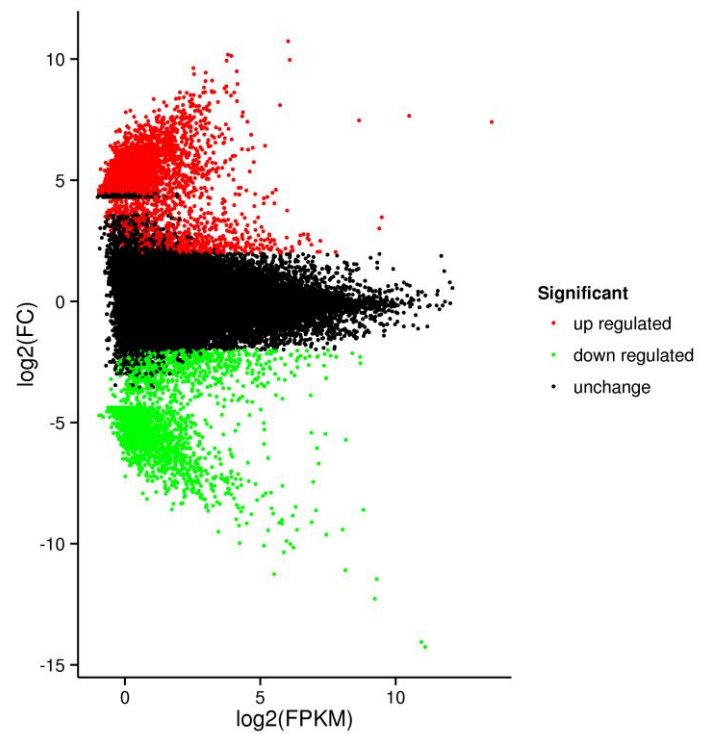

SFigure 3 Volcano plot of differentially expressed genes

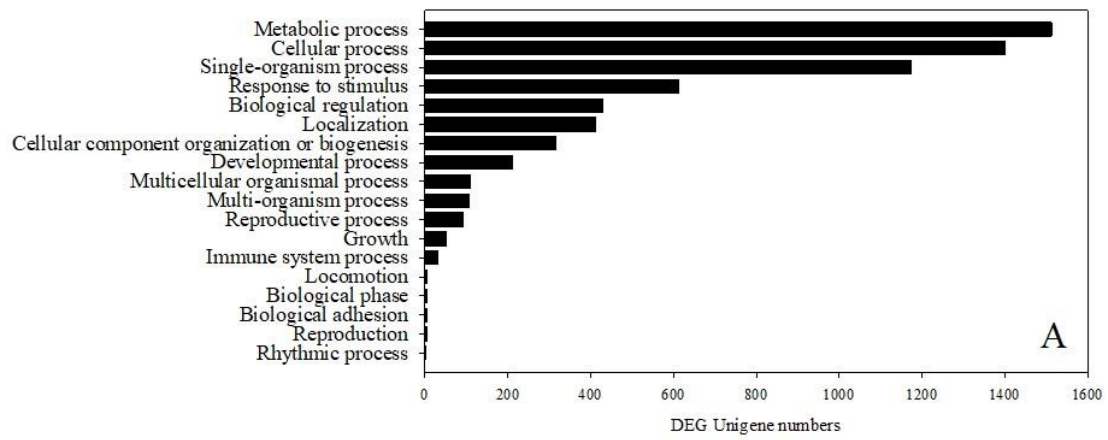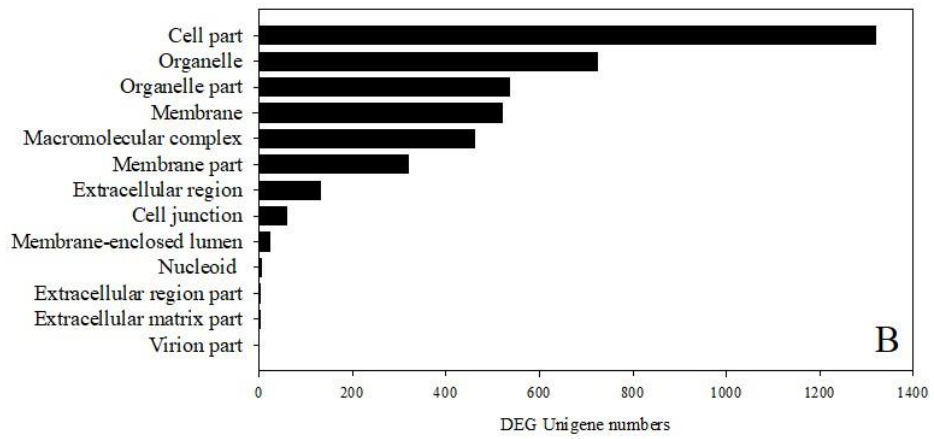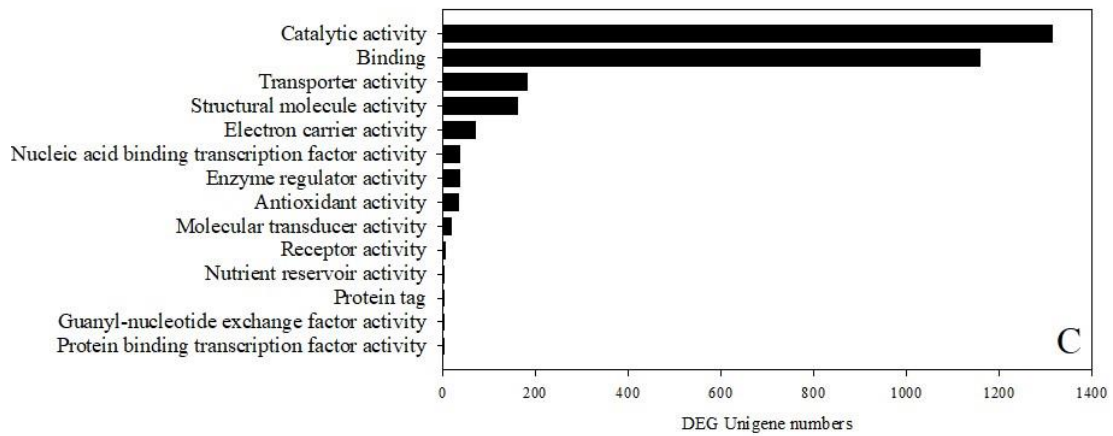

SFigure 4 GO annotation of different expression genes

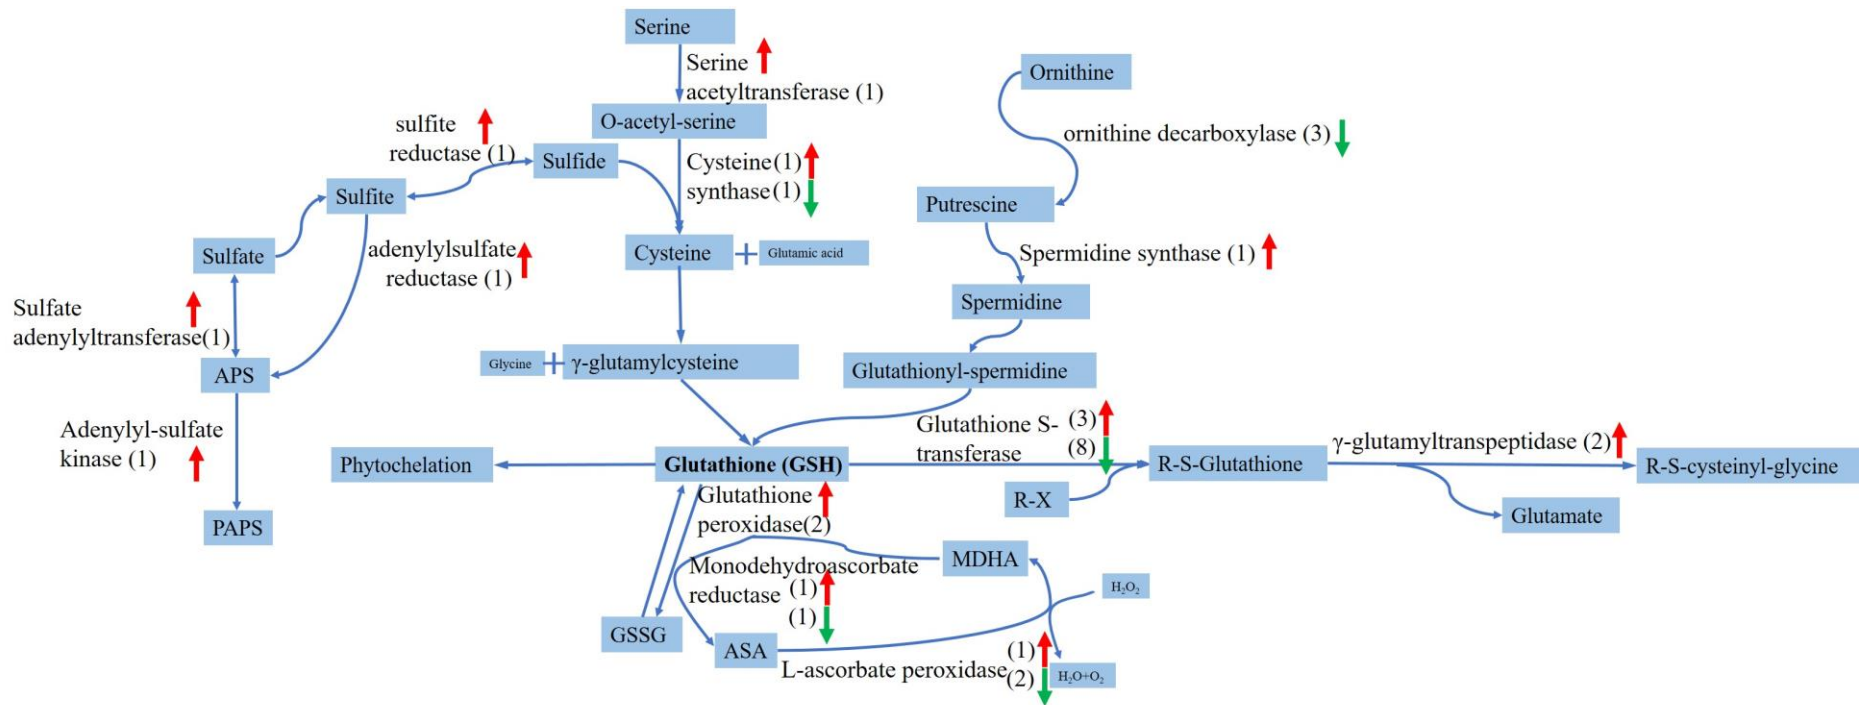

SFigure 5 Transcriptional changes in genes involved in GSH metabolism

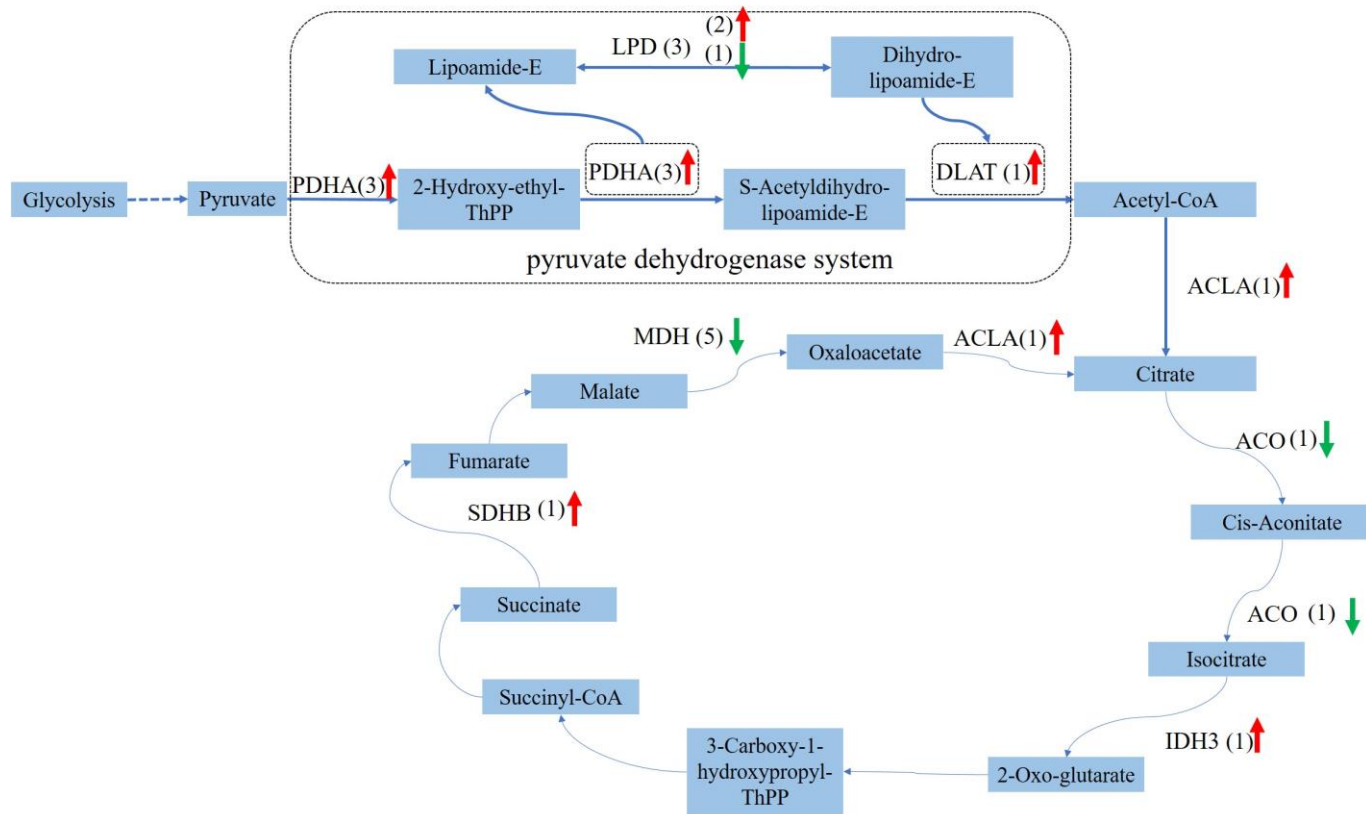

SFigure 6 Transcriptional changes in genes involved in TCA pathway

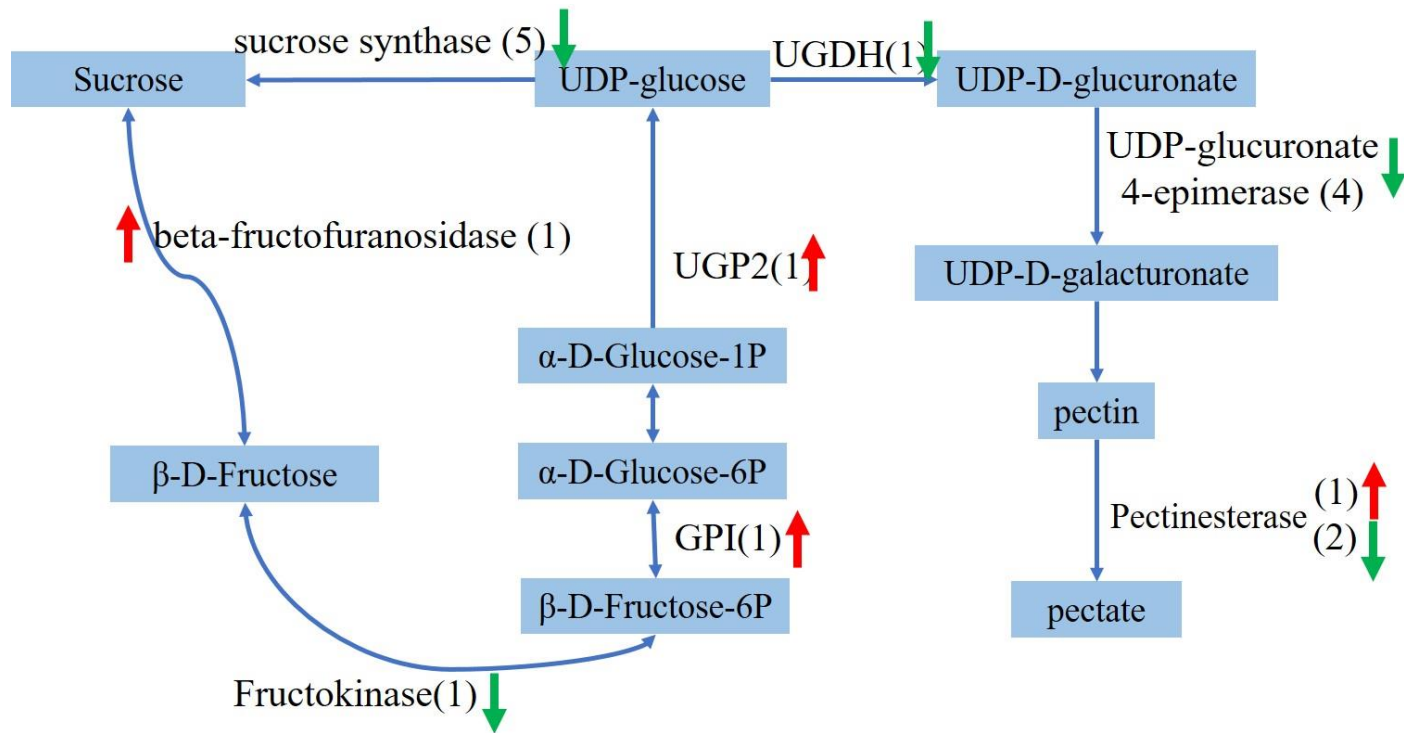

SFigure 7 Transcriptional changes in genes involved in glucose metabolism
